# Supplementary material for: Earth's field NMR relaxation of pre-polarised water protons for real-time detection of free-radical formation
Source: Royal Society of Chemistry journal article supplement (doi:10.1039/d3cc02502k), 2023-01-01
Supplement: d3cc02502k1.pdf [file d3cc02502k1.pdf]

## Supporting Information

### Earth's field NMR relaxation of pre-polarised water protons for real-time detection of free-radical formation

Table of contents:

|                                                                                                                        |       |
|------------------------------------------------------------------------------------------------------------------------|-------|
| I. Experimental NMR apparatus and methods for the determination of relaxation time constants in Earth's magnetic field | pg 2  |
| I.1 Apparatus                                                                                                          |       |
| I.2 Pulse sequences                                                                                                    |       |
| I.3 Sample preparation                                                                                                 |       |
| I.4 Fits of experimental data                                                                                          |       |
| II. Reproducibility and error analysis for hydrogen peroxide decay results, kinetic model                              | pg 8  |
| II.1 Reproducibility, error analysis                                                                                   |       |
| II.2 Kinetic model                                                                                                     |       |
| III. Relaxation rate constants for free-radical detection in cell-growth medium                                        | pg 11 |
| IV. Comparison between different magnetic resonance methods for the detection of free-radicals in water                | pg 12 |

## I. Experimental NMR apparatus and methods for the determination of relaxation time constants in Earth's magnetic field

### I.1 Apparatus

The Earth-field NMR apparatus used for our experiments was developed by Terranova MRI. It is designed to conduct NMR relaxation and imaging experiments and it consists of a three-component probe system and an ultra-low frequency spectrometer (Fig. S1). The three-component probe includes a polarizing coil, an excitation/detection coil and a gradient coil set.

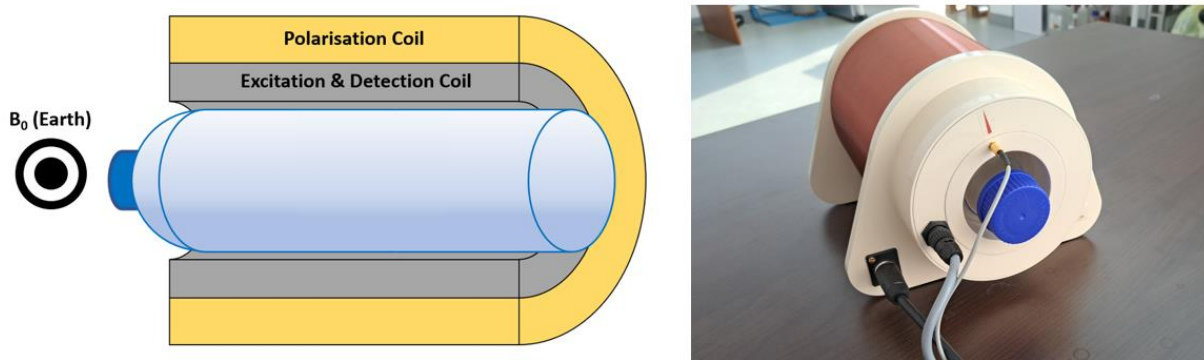

Fig. S1. The experimental setup: Terranova MRI system and chemical reaction monitoring in aqueous samples.

For magnetisation excitation and detection, a solenoid tuned by the resonance circuitry to the water  $^1\text{H}$  Larmor frequency corresponding to Earth's field -  $\nu_0(^1\text{H}) = 2.3$  kHz at our location - is used. A set of gradient coils is provided for multi-dimensional imaging and for shimming.

An additional polarizing coil is used to boost the thermal magnetisation of the sample before excitation and free-precession in the Earth's field ( $B_{\text{Earth}} = 0.05$  mT at our location), and therefore to enhance the sensitivity of the method. The polarizing coil is solenoidal and produces a magnetic field  $B_p = 18.7$  mT along its axis when a 6 A current is used. The inhomogeneity of this field is at most 10 - 15% within a cylindrical region of 100 mm in length and 75 mm in diameter.

## I.2 Pulse sequences

The pulse sequences employed for the measurement of longitudinal and transverse relaxation rate constants as a function of free-radical concentration are variants of classical methods: (i) perturbation of initial magnetisation followed by longitudinal relaxation to its equilibrium value and (ii) series of time-points of transverse magnetisation evolution while the chemical shift evolution is refocused. We have improved sensitivity for NMR experiments in Earth's magnetic field without altering the specific precession frequency via pre-polarisation: a polarising magnetic field, perpendicular to the Earth's field, was generated in the first experimental step (Figs. S2-S3).

Once polarisation has built-up using a current  $I_p$  in the enhanced magnetisation (or polarisation), the pre-polarising field is switched off and the polarisation is adiabatically converted to the Earth's magnetic field orientation, and decays back to its equilibrium value.

$$M_0 \sim \frac{N_s \gamma^2 \hbar^2 (B_p / I)}{4k_B T} I_p \sim \varepsilon M_{Earth}$$

In the equation above,  $M_0$  is the magnetisation/polarisation after applying a polarising current  $I_p$  to saturation (typically 6 seconds),  $B_p$  is the characteristic field of the polarising coil for a unit current  $I$ ,  $N_s$  is the natural population of polarised spins in Earth's field,  $\gamma$  is the proton gyromagnetic ratio,  $\hbar$  is the Planck constant,  $k_B$  is Boltzmann's constant and  $T$  is the sample temperature. The enhancement factor obtained by pre-polarisation is  $\varepsilon = B_p / B_{Earth} \sim 350$ .

The pulse sequences used to determine the longitudinal and transverse NMR relaxation parameters,  $T_1$  and  $T_2$ , are tailored to the conditions of adiabatic switching off of the polarizing field followed by the excitation and detection in Earth's field.

### (i) Longitudinal relaxation of magnetisation: the polarisation-recovery experiment

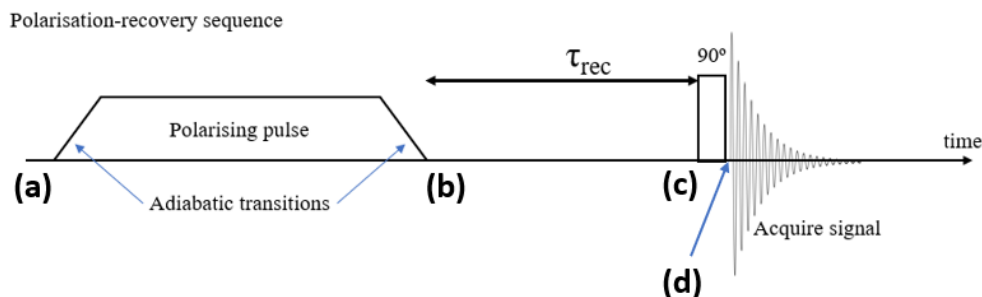

Fig. S2. Polarisation-recovery sequence with highlighted time points of magnetisation evolution

The initial magnetisation arising purely from Earth's field (a) is subjected to a polarising pulse then adiabatically led towards a parallel orientation with respect to the Earth's magnetic field (b). Polarisation-enhanced magnetisation  $M_0$  decays under the action of longitudinal relaxation during various evolution time points  $\tau_{rec}$  as  $M_{//}(\tau_{rec})$ . At the end of this time, the  $M_{//}$  magnetization remaining (c) is flipped by a  $90^\circ$  pulse to transverse magnetisation  $M_t$  in order to produce a signal in the measuring coil (Fig. S2).

The characteristic longitudinal relaxation time constant  $T_1$  is obtained by plotting the obtained signal with respect to  $\tau_{rec}$  according to the equations below:

Time point (b):  $M_{//}(0) = M_0$

Time point (c):

$$M_{//}(\tau_{rec}) = M_0 \left[ 1 - \exp\left(\frac{-\tau_{rec}}{T_1}\right) \right]$$

Time point (d):

$$M_{//}(\tau_{rec}) \rightarrow M_t(\tau_{rec})$$

**(ii) Transverse relaxation of magnetisation: the Carr-Purcell-Meiboom-Gill (CPMG) experiment**

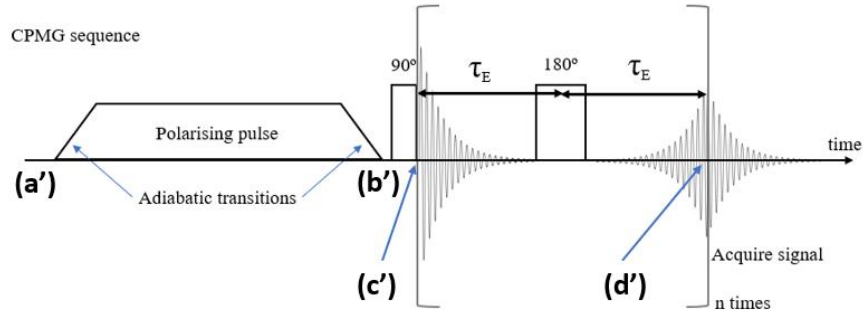

Fig. S3. CPMG sequence and time points of magnetisation evolution

The transverse relaxation time,  $T_2$ , is determined from the decay of the echo-train generated by the **Carr-Purcell-Meiboom-Gill (CPMG)** method (Fig. S3). The sequence consists of a suite of 180° pulses designed to refocus the chemical shift evolution. The pulses are equidistantly applied to generate additional echoes, starting from an initial 90°-180° spin-echo.

The initial magnetisation arising purely from Earth's field (a'), is subjected to a polarising pulse and adiabatically switched to Earth's field orientation (b'). Magnetisation  $M_0$  is flipped by a 90° pulse and becomes transverse  $M_t(0)$  at point (c'). This magnetisation evolves by precessing around Earth's field. The 90°-180° delay is defined as  $\tau_E$ , at this point the 180° pulse flips the  $M_t$  magnetisation to  $-M_t$ , after another delay of  $\tau_E$  the magnetization  $M_t$  is refocused and the spin echo produces a signal. Thus, increasing steps of  $2\tau_E$  (echo times) refocus the signal and allow for repeated measurements (d'), plotting the signal versus the  $2\tau_E$  steps yields the relaxation time constant  $T_2$ , according to the equations below:

Time point (b'):  $M_{//}(0) = M_0$

Time point (c'):  $M_{//}(0) \rightarrow M_t(0)$

Time point (d'):  $M_t(2\tau_E) = M_t(0) \exp\left(\frac{-2\tau_E}{T_2}\right)$

Table S1. Parameters used in our EFNMR experiments

|                                                        |                                  |                         |                              |               |                            |                    |                      |                     |              |
|--------------------------------------------------------|----------------------------------|-------------------------|------------------------------|---------------|----------------------------|--------------------|----------------------|---------------------|--------------|
| <i>Longitudinal Relaxation (polarisation-recovery)</i> |                                  | 90° pulse duration (ms) | Pre-90° delay step size (ms) | No. of steps  | 90° Acquisition delay (ms) | No. of data points | Acquisition time (s) | Repetition time (s) | No. of scans |
|                                                        |                                  | 1.3                     | 500                          | 15            | 25                         | 16384              | 1                    | 20                  | 1            |
| <i>Transverse Relaxation (CPMG)</i>                    | Concentration (timeframe) regime | 90° pulse duration (ms) | 180° pulse duration (ms)     | No. of Echoes | Echo time (ms)             | No. of data points | Dwell time (µs)      | No. of scans        |              |
|                                                        | Low conc.                        | 1.3                     | 2.7                          | 30            | 100                        | 1024               | 100                  | 8                   |              |
|                                                        | High conc. (stable paramagnets)  |                         |                              | 20            | 35                         |                    | 20                   | 4                   |              |
|                                                        | High conc. (oxygen production)   |                         |                              | 15            | 50                         | 256                | 50                   |                     |              |

More details of the methods implementation Terranova Earth's field equipment can be found in the main text Reference 3 and the following link: <http://researcharchive.vuw.ac.nz/handle/10063/1198>.

### I.3 Sample preparation

In the case of stable paramagnets, each measurement was carried out in a 315 mL flask by preparing a sample of the relaxation agent in de-ionised water, at concentrations ranging from 1 mM down to 3.9 µM by successive dilutions. A pure water sample was used as reference when performing polarisation-recovery experiments to determine  $T_1$  or CPMG sequences to determine  $T_2$ . The obtained  $T_1$  and  $T_2$  values were converted to relaxation rate constants  $R_1 = 1/T_1$  and  $R_2 = 1/T_2$  in order to describe water  $^1\text{H}$  magnetisation relaxation as a linearly-dependent quantity on the concentration of the paramagnetic compound.

For the free-radical generation experiments, after preparation in a 315 mL flask with known starting concentrations of  $\text{H}_2\text{O}_2$  and CsI as the catalyst, all samples were quickly introduced in the Earth-field NMR magnet detection coil and CPMG measurements were performed at set intervals until  $T_2$  reached a plateau. The relaxation rate constant  $R_2 = 1/T_2$  dependence on the reaction time was used to follow the reaction evolution. In the case of the first reaction pathway – described by eqns. (1)-(2) in the main text, without a spin-trap molecule - multiple sets of experiments were performed with different starting concentrations to test the response of the chemical system and to gain information about the regime in which the reaction order changes for either species. When using 5 mM  $\text{H}_2\text{O}_2$  and 50 mM CsI, the reaction is 0<sup>th</sup>-order with respect to the catalyst and 1<sup>st</sup>-order with respect to the reactant. We used these starting conditions to fit the kinetic model via the relaxation rate constant values ( $R_2$ ), which increase with the concentration of produced  $\text{O}_2$ . For the second pathway, which takes place in the presence of a spin-trap and is described by Eqns. (1)-(3) in the text, a similar experiment was conducted using PBN to trap  $\cdot\text{OH}$  radicals, with the starting concentrations being 5 mM  $\text{H}_2\text{O}_2$ , 50 mM CsI, and 20 mM PBN.

## I.4 Fits of experimental data

For paramagnetic relaxation rate constant determination experiments with stable free-radicals as the relaxation source, examples of  $T_1$  and  $T_2$  measurements are shown in Fig. S4. The low-concentration domain of the relaxation rate constants  $R = 1/T$  is shown in Fig. S5; relaxivity values are listed in Table S2.

Fig. S4. Examples of fits of  $T_1$  (left) and  $T_2$  (right) for TEMPO solutions of 1 mM (top), 0.125 mM (middle) and

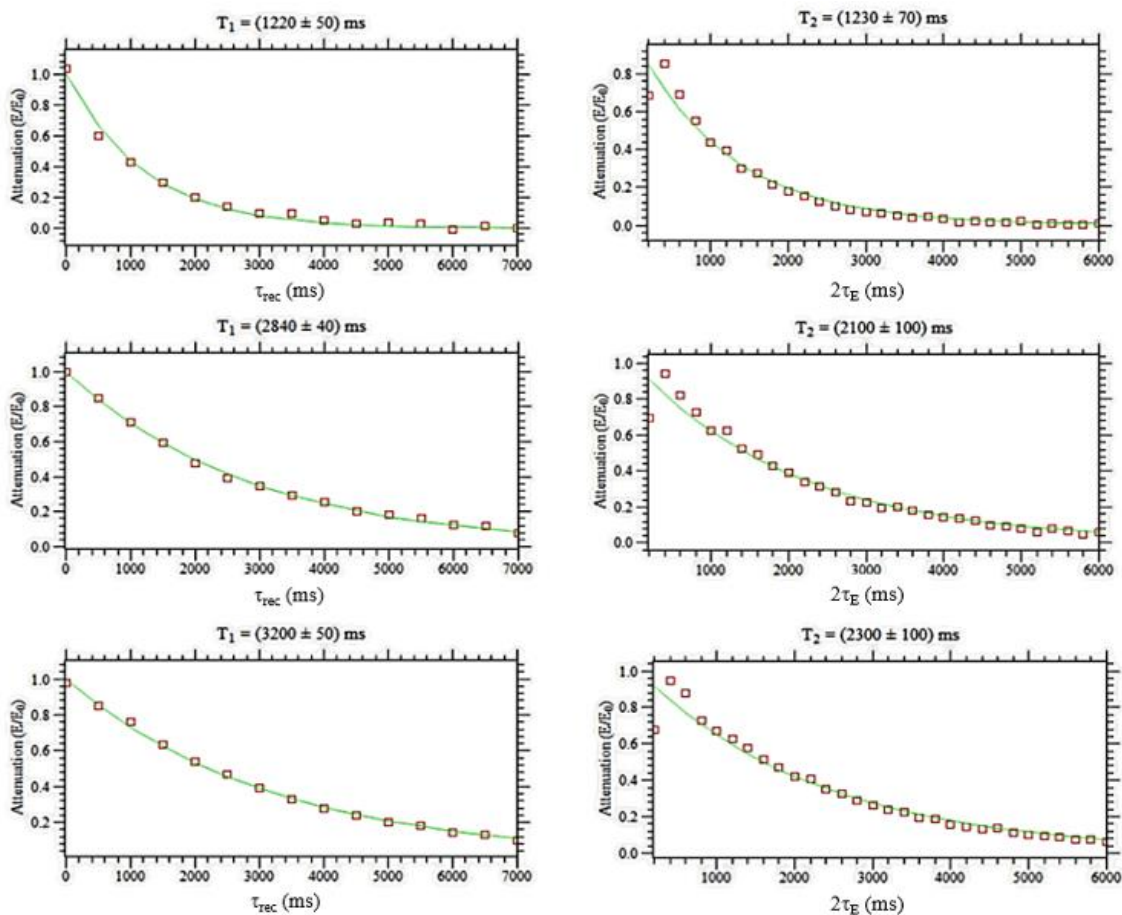

0.031 mM (bottom). Amplitude data is plotted versus recovery time ( $\tau_E$ ) for  $T_1$  and versus echo time ( $2\tau_E$ ) for  $T_2$ .

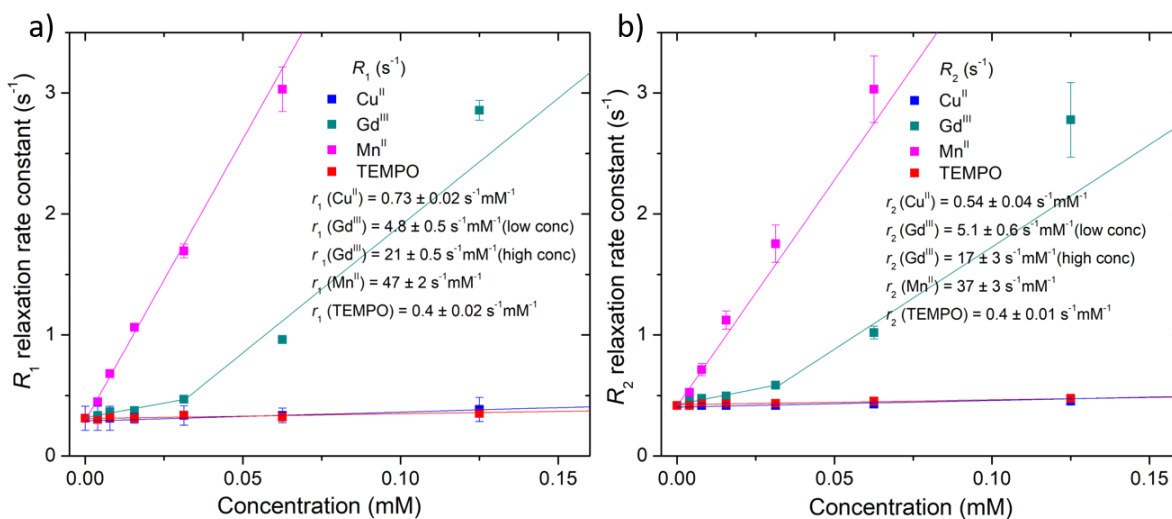

Fig. S5. Plots of  $R_1$  (a) and  $R_2$  (b) in the low-concentration region;  $Gd^{III}$  features two linear relaxation regimes, possibly indicating a change in dominant electronic relaxation dynamics due to inter-ion interactions above  $50 \mu M$  concentration.

Table S2. Longitudinal and transverse NMR relaxivity values in water solution.

| Species    | $r_1$ ( $s^{-1} mM^{-1}$ ) | $r_2$ ( $s^{-1} mM^{-1}$ ) |
|------------|----------------------------|----------------------------|
| TEMPO      | $0.40 \pm 0.02$            | $0.40 \pm 0.01$            |
| $Cu^{II}$  | $0.73 \pm 0.02$            | $0.54 \pm 0.04$            |
| $Gd^{III}$ | $4.8 \pm 0.5$              | $5.1 \pm 0.5$              |
|            | $21.0 \pm 0.4$             | $16.9 \pm 2.8$             |
| $Mn^{II}$  | $46.6 \pm 2.4$             | $37.4 \pm 3.2$             |

The relaxivity values obtained for transition metal ions warrant detection of changes in paramagnetic relaxation effects upon changes in concentration in the range of tens of micromolar. In the case of organic free radicals, changes in concentration in the mM range are needed in order to induce observable effects.

## II. Reproducibility and error analysis for hydrogen peroxide decay results, kinetic model

### II.1 Reproducibility, error analysis

The reproducibility of the experimental data for the radical-generation experiments was tested recording three data sets in the same conditions (fig. S5). The error ranges and average errors for all experiments are listed in Table S3.

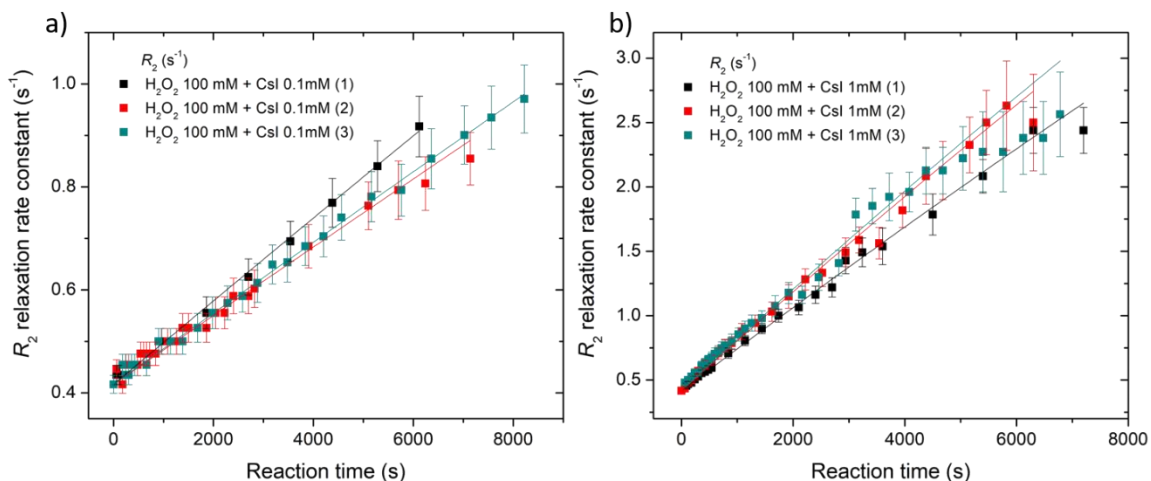

Fig. S6.  $H_2O_2$  decay reproducibility with 100 mM  $H_2O_2$  starting concentration and 0.1 mM (a), 1 mM CsI (b) concentration.

Relaxation rate constants recorded for solutions containing only  $H_2O_2$  (no catalyst) or only the CsI (no  $H_2O_2$ ) were within the standard deviation of relaxation rates recorded for samples without any reactant both in the case of water samples and in the case of cell-growth media (see below).



Table S3. Error data for H<sub>2</sub>O<sub>2</sub> decay experiments

| H <sub>2</sub> O <sub>2</sub> decay experiments error data                 |                   |                               |                                       |                                                |                                              |                                                |                                                 |
|----------------------------------------------------------------------------|-------------------|-------------------------------|---------------------------------------|------------------------------------------------|----------------------------------------------|------------------------------------------------|-------------------------------------------------|
| H <sub>2</sub> O <sub>2</sub> conc.                                        | CsI conc.         | Spin-trap (PBN) conc.         | Cell growth medium                    | R <sub>2</sub> Error range (s <sup>-1</sup> )  | R <sub>2</sub> Mean Error (s <sup>-1</sup> ) | R <sub>2</sub> Median Error (s <sup>-1</sup> ) | Standard Deviation of errors (s <sup>-1</sup> ) |
| 100 mM                                                                     | -                 | -                             | -                                     | 0.017 - 0.035                                  | 0.02                                         | 0.0198                                         | 0.005                                           |
| 100 mM                                                                     | 0.1 mM            | -                             | -                                     | 0.017 - 0.065                                  | 0.032                                        | 0.028                                          | 0.013                                           |
| 100 mM                                                                     | 1 mM              | -                             | -                                     | 0.017 - 0.381                                  | 0.097                                        | 0.057                                          | 0.088                                           |
| 100 mM                                                                     | 5 mM              | -                             | -                                     | 0.017 - 0.781                                  | 0.200                                        | 0.148                                          | 0.174                                           |
| 100 mM                                                                     | 10 mM             | -                             | -                                     | 0.017 - 1.171                                  | 0.310                                        | 0.185                                          | 0.274                                           |
| 10 mM                                                                      | 10 mM             | -                             | -                                     | 0.017 - 0.140                                  | 0.061                                        | 0.058                                          | 0.030                                           |
| 1 mM                                                                       | 10 mM             | -                             | -                                     | 0.017 - 0.039                                  | 0.025                                        | 0.022                                          | 0.006                                           |
| 5 mM                                                                       | 50 mM             | -                             | -                                     | 0.003 - 0.048                                  | 0.019                                        | 0.017                                          | 0.009                                           |
| 5 mM                                                                       | 50 mM             | 20 mM                         | -                                     | 0.006 - 0.031                                  | 0.016                                        | 0.016                                          | 0.005                                           |
| 100 mM                                                                     | 10 mM             | -                             | present                               | 0.028 - 2.221                                  | 0.420                                        | 0.259                                          | 0.631                                           |
| Kinetic model fit parameters for the pseudo-1 <sup>st</sup> order reaction |                   |                               |                                       |                                                |                                              |                                                |                                                 |
| H <sub>2</sub> O <sub>2</sub> concentration                                | CsI concentration | Spin-trap (PBN) concentration | k <sub>decay</sub> (s <sup>-1</sup> ) | Error in k <sub>decay</sub> (s <sup>-1</sup> ) | Conversion factor α                          | Error in α                                     | R <sup>2</sup> coefficient                      |
| 5 mM                                                                       | 50 mM             | No PBN                        | 1.38·10 <sup>-3</sup>                 | 0.04·10 <sup>-3</sup>                          | -                                            | -                                              | 0.996                                           |
| 5 mM                                                                       | 50 mM             | 20 mM                         | 1.63·10 <sup>-3</sup>                 | 0.04·10 <sup>-3</sup>                          | 0.103                                        | 0.007                                          | 0.997                                           |

Reference solutions for all catalysed decay experiments contain only the catalyst, the measured R<sub>2</sub> is always the t=0 point in these experiments. The determination coefficient R<sup>2</sup> is defined as the ratio of the regression sum of squares over the total sum of squares. Error bars in relaxation rate / time constants are given as standard deviations of parameters from the fits of water <sup>1</sup>H intensities as a function of time delays (fig. S4).

## II.2 Kinetic model

The global chemical reaction's kinetics can be represented by:

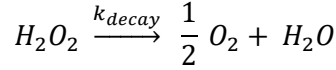

with starting concentrations:  $[H_2O_2]_0$   $[O_2]_0 = 0$

and concentrations at time t:  $[H_2O_2](t) = [H_2O_2]_0 - x(t)$ ;  $[O_2](t) = \frac{1}{2} x(t)$

Herein,  $[H_2O]$  is considered a constant, as any changes are very small compared to the bulk,  $x$  is a conversion factor, CsI catalyst is not included in the global model, as its concentration (50 mM) is 10 times larger than that of  $H_2O_2$  (5 mM). We consider the conditions pseudo-0<sup>th</sup>-order relative to the catalyst, since its net action is included in the global kinetic constant  $k_{decay}$ , and pseudo-1<sup>st</sup>-order relative to the reactant,  $H_2O_2$ .

This simplified approach is only valid for the data fits in Fig. 4 of the main text.

The basic rate law:

$$v(t) = \frac{-d[H_2O_2](t)}{dt} = k_{decay}[H_2O_2](t)$$

yields, integrating for time and concentration ranges and expressing oxygen evolution:

$$[O_2](t) = \frac{1}{2} [H_2O_2]_0 (1 - e^{-k_{decay}t})$$

Taking into account the relaxivity of oxygen,  $r_2(O_2)$ , and the fact that the measured solution relaxation rate constant  $R_2$  is the sum of the reference  $R_{2initial}$  (measured on a reference solution of 50 mM CsI) and the additional relaxation contribution due to oxygen production  $R_2(O_2)(t)$ , the rate law for the global reaction is:

$$R_2(t) = R_{2initial} + R_2(O_2)(t); \quad R_2(O_2)(t) = [O_2](t) \cdot r_2(O_2)$$

$$R_2(t) = R_{2initial} + \frac{r_2(O_2)}{2} [H_2O_2]_0 (1 - e^{-k_{decay}t})$$

The addition of spin-traps perturbs the system, and the conversion factor  $\alpha$  accounts for this perturbation occurring via the competition of PBN for  $\cdot OH$  radicals against the recombination of  $\cdot OH$  radicals to yield  $O_2$ . In this case:

$$R_2(t) = R_{2initial} + (1 - \alpha) \frac{r_2(O_2)}{2} [H_2O_2]_0 (1 - e^{-k_{decay}t})$$

### III. Relaxation rate constants for free radical detection in cell-growth medium

We used Earth-field NMR to monitor paramagnetic species formation in cell-growth DMEM medium taken from a glioblastoma cell culture sample. The cell growth's medium initial composition consists of amino-acids and metabolites (DMEM high-glucose with calf serum W/L-Glutamine W/o Sodium Pyruvate, EU Cat No. 392-0414) treated with ampiciline and streptomycin: [https://si.vwr.com/assetsvc/asset/sl\\_SI/id/36648559/contents/tds-dmem-with-4-5-g-per-l-glucose-with-l-glutamine-without-sodium-pyruvate-500-ml\\_392-0414.pdf](https://si.vwr.com/assetsvc/asset/sl_SI/id/36648559/contents/tds-dmem-with-4-5-g-per-l-glucose-with-l-glutamine-without-sodium-pyruvate-500-ml_392-0414.pdf)

The medium was collected one week after cell culture initiation in order to ensure the presence of products of cell catabolism. The medium was then stored at  $-80^{\circ}\text{C}$  prior to Earth's field NMR measurements. The stability of the cell-growth medium after warming to room temperature in absence of any  $\text{H}_2\text{O}_2$  or catalyst was checked by  $^1\text{H}$  NMR relaxation profiles shown in Fig. S7 (a). The effects of adding 100 mM  $\text{H}_2\text{O}_2$  and monitoring of the medium response are shown in Fig. S7 (b).

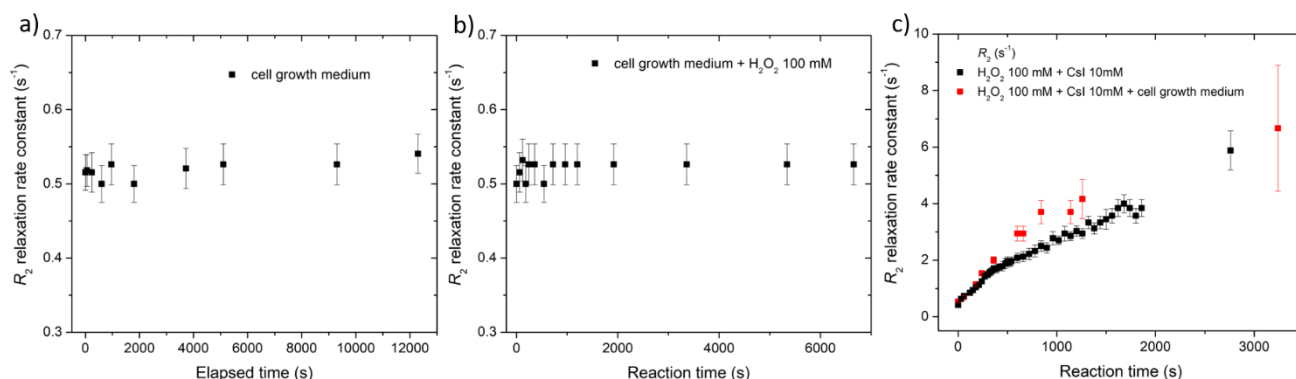

Fig. S7. Cell growth medium stability (a), monitoring after addition of 100 mM  $\text{H}_2\text{O}_2$  (b), addition of 10 mM CsI (c)

The stable  $R_2$  values shown in Fig. S7 (b) indicate that any chemical reactions between the hydrogen peroxide in this medium in the absence of CsI does not yield PRE-generating compounds. A high concentration of  $\text{H}_2\text{O}_2$  was employed (100 mM) in order to readily detect any possible interference with the formation of paramagnetic  $\text{O}_2$  due to the oxidation of compounds in the cell-growth medium. Subsequently, 50 mM CsI was added to catalyze  $\text{H}_2\text{O}_2$  decay and the  $R_2$  data is shown in Fig. S7. (c). A time-dependent increase of  $R_2$  was readily detected. The data is compared to the equivalent experiment without any cell-growth medium presented in the article. The detected profiles are similar, with slightly increased  $R_2$  values for water  $^1\text{H}$  in the cell-growth medium, which most likely stem from the increased effective correlation times for relaxation mechanisms in this medium due to sample viscosity.

#### IV. Comparison between different magnetic resonance methods for the detection of free-radicals in water

The generation of paramagnetic species in water can be detected directly using electron spin resonance (ESR) and indirectly by nuclear magnetic resonance (NMR). The incentive for NMR detection, as discussed in the main text, are advantages in terms of spatial resolution for imaging applications afforded by the lifetimes of nuclear spin magnetisation, which enables the use of long field gradients. Paramagnetic effects on water protons can be detected via NMR chemical shift dispersion<sup>1</sup> or via NMR relaxation.<sup>2-4</sup> Measuring chemical shifts requires highly-homogeneous magnetic fields provided by high-resolution NMR spectrometers, which are expensive devices due to the fact that superconducting magnets are used. Moreover, the susceptibility-induced field distortions generated in many applications of interest involving paramagnetic species can render the use of high-resolution NMR extremely difficult for free radicals. A more straightforward approach is the use of time-domain NMR relaxation, which can be detected at any field strength and even in inhomogeneous fields.<sup>5</sup> Time-domain relaxation methods can be deployed on a wide range of NMR equipment, such as benchtop and portable/mobile instruments, typically operating at low-fields. The main advantages of using NMR in Earth's field are primarily the long signal life time and the very low cost of the equipment.

Table S4. Comparison of the characteristics of magnetic resonance experimental devices amenable to free-radical detection.

| Method                                 | <sup>1</sup> H frequency | Spatial imaging capability | Pros                                                                                                                                                                                                        | Cons                                      |
|----------------------------------------|--------------------------|----------------------------|-------------------------------------------------------------------------------------------------------------------------------------------------------------------------------------------------------------|-------------------------------------------|
| Earth-Field NMR (EF-NMR)               | 2.3 kHz                  | Yes                        | -Highly homogeneous field;<br>-Long signal lifetime;<br>-Portable;<br>-Easy access to sample, open-top/bottom;<br>- Low cost<br>- Circumvents the use of additional static magnetic fields during detection | -Large sample volumes<br>-Low sensitivity |
| Portable/mobile Low-Field NMR (LF-NMR) | Tens of MHz              | Yes                        | - Portable<br>- Small sample volumes (mL)                                                                                                                                                                   | -Inhomogeneous field                      |
| Benchtop LFNMR                         | Up to 100 MHz            | Limited                    | -Fairly homogeneous field<br>-Fair sensitivity                                                                                                                                                              | - Less portable or not portable           |
| High-Field NMR (HF-NMR)                | Above 100 MHz            | Yes                        | - Homogeneous field<br>- Most sensitive                                                                                                                                                                     | - Expensive<br>-Lab environment only      |

Water relaxation in the presence of paramagnetic species was widely studied in the field of biochemistry, chemical engineering and medical imaging.<sup>4,6</sup> Redox reactions and complexation were for the first time followed by NMR relaxometry in 1973.<sup>7</sup> Decomposition of hydrogen peroxide in catalytic reactions was investigated by relaxometry at low- and high-field NMR and in combination with pH measurements allowed the determination of its concentration during the reaction.<sup>8</sup> Time-domain relaxometry was successfully employed to determine concentrations of paramagnetic metal cations in aqueous solutions.<sup>4,9,10</sup> Earth-field NMR detection is adapted for applications where magnetic fields would interfere with the detected effect, such as radiobiology with charged particle beams<sup>11</sup>. To our knowledge, this article shows

the first demonstration of Earth-field NMR relaxation detection of paramagnetic effects induced by free-radicals generated *in situ*.

#### References:

1. A. J. Pell, G. Pintacuda, C. P. Grey, *Prog. Nucl. Magn. Reson.*, 2019, **111**, 1–271.
2. G. Chiarotti, G. Cristiani, L. Giulotto, *Nuovo Cim*, **1955**, *1* (5), 863–873.
3. D. S. Parker, J. F. Harmon, *Chem. Phys. Lett.* 1974, **25** (4), 505–506.
4. F. Kock, L. Colnago, *J. Braz. Chem. Soc.*, 2022.
5. B. Blümich, *J. Magn. Reson.*, 2019, **306**, 27–35.
6. C. Luchinat, *Magn. Reson. Chem.*, 1993, **31** (13), S145–S153.
7. A. Schluter, A. Weiss, *Z. Anal. Chem.* 1973, **266** (3), 177–186.
8. L. Buljubasich, B. Blümich, S. Stapf, *Chem. Eng. Sci.* 2010, **65** (4), 1394–1399.
9. B. F. Gomes, J. S. da S. Burato, C. M. Silva Lobo, L. A. Colnago, *Int. J. Anal. Chem.*, 2016, **2016**, 1–5.
10. Y. Gossuin, P. Duez, B. Blankert, C. Masson, S. Laurent, C. Rousseau, *Magn. Reson. Chem.* 2023, **61** (5), 284–295.
11. H. Fuchs, F. Padilla-Cabal, L. Zimmermann, H. Palmans, D. Georg, *Med. Phys.* 2021, **48**(5): 2572–2579
